# Supplementary material for: Dynamics of adipose tissue macrophage populations after gastric bypass surgery
Source: PubMed Central journal article supplement — Obesity (Silver Spring). 2022 Dec 7;31(1):184–91. doi: 10.1002/oby.23602 (PMC10107220; doi:10.1002/oby.23602), 2022-12-07
Supplement: OBY-31-184-s001.pdf [file OBY-31-184-s001.pdf]

## Supplementary Figure S1: Dynamics of adipose tissue macrophage populations after gastric bypass surgery

Palomäki Ville A<sup>a\*</sup>, Lehenkari Petri<sup>b</sup>, Meriläinen Sanna<sup>a</sup>, Karttunen Tuomo J<sup>b</sup>, Koivukangas Vesa<sup>a</sup>

<sup>a</sup> Oulu University Hospital, Department of Surgery, Oulu, Finland

<sup>b</sup> Cancer and Translational Medicine Research Unit, Medical Research Center Oulu, Oulu University Hospital and University of Oulu, Oulu, Finland

\*Correspondence to Ville A Palomäki. Department of Surgery, Oulu University Hospital and University of Oulu, Kajaanintie 50, 90220 Oulu, Finland.

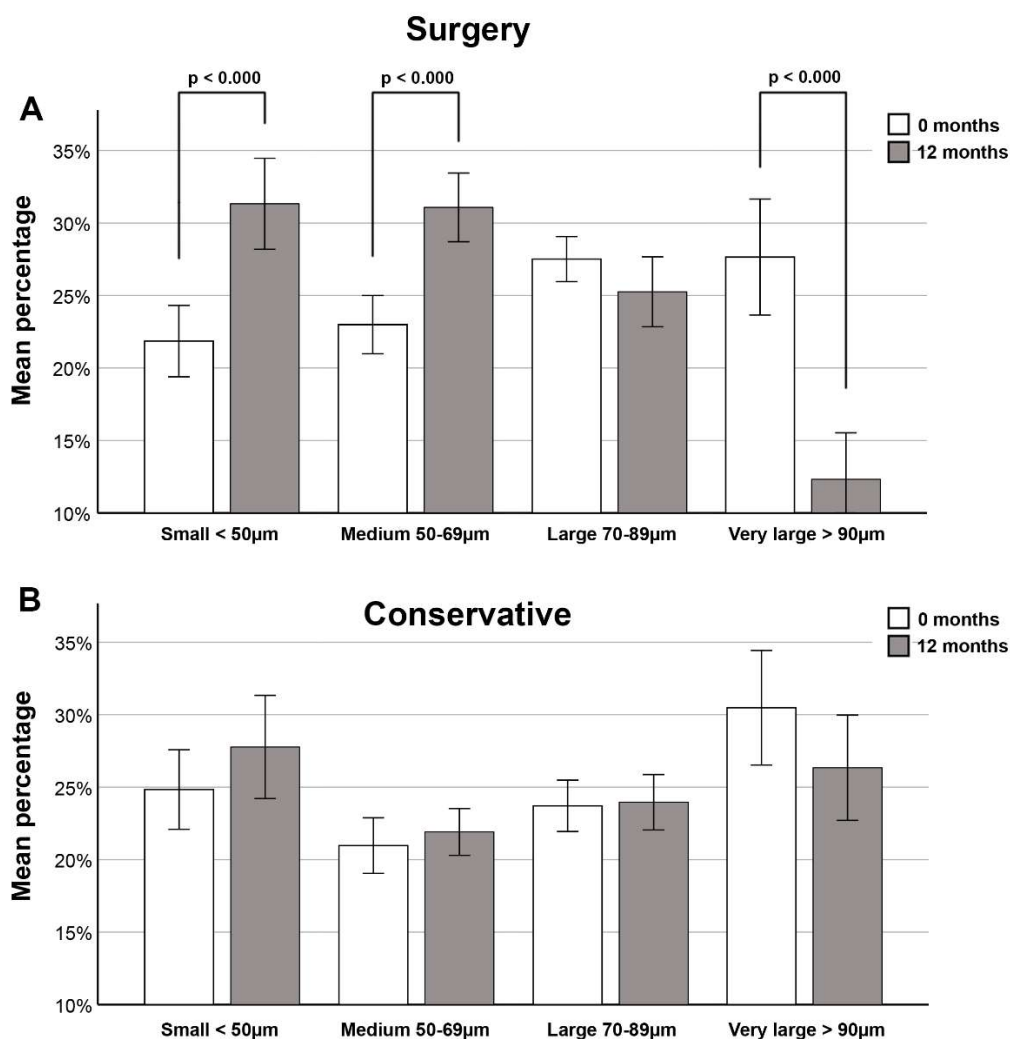

**Supplementary Figure S1:** Fat cell size distribution according to mean diameter. Proportion of small (<50µm) and medium (50-69µm) adipocytes increased and that of very large (>90µm) decreased significantly after laparoscopic Roux-en-Y gastric bypass (paired sample t-test). No significant change was observed in the conservative group.
